# Supplementary material
Source: PubMed Central journal article supplement (PMC7201903)
Supplement: NIHMS1574871-supplement-2.pdf [file NIHMS1574871-supplement-2.pdf]

## Figure S1

### A Anti-Lamin A/C antibodies used in this study

| Lamin A/C Antibody  | Antigen                                  | Type              | Catalog No.                 | Application (this study)                                    |
|---------------------|------------------------------------------|-------------------|-----------------------------|-------------------------------------------------------------|
| Anti-pS22           | Synthetic phosphopeptide surrounding S22 | Rabbit monoclonal | Cell Signaling D2B2E #13448 | ELISA, ChIP, IF, Western of endogenous Lamin A/C            |
| Anti-pan-N-terminal | Synthetic non-phospho peptide aa 2-29    | Mouse monoclonal  | Santa Cruz E1 sc-376248     | ELISA, ChIP, IF, Western of endogenous Lamin A/C            |
| Anti-full-length    | Recombinant full length aa 1-664         | Mouse monoclonal  | Abcam 4C4 ab190380          | ChIP, IF of transgene-derived WT & phospho-mutant Lamin A/C |

### B Anti-pS22 specificity in ELISA

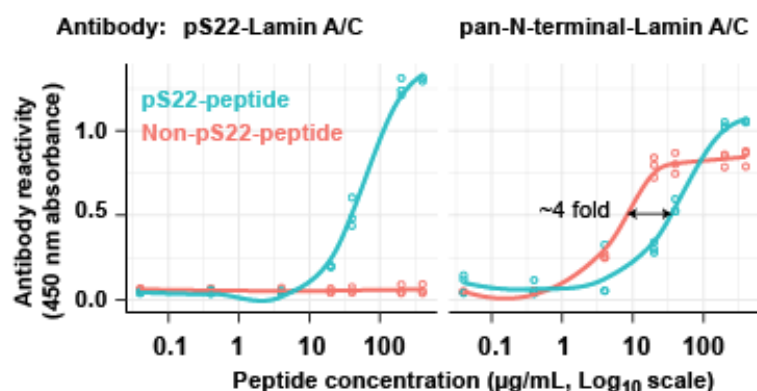

### C No antibody control for flow-cytometry

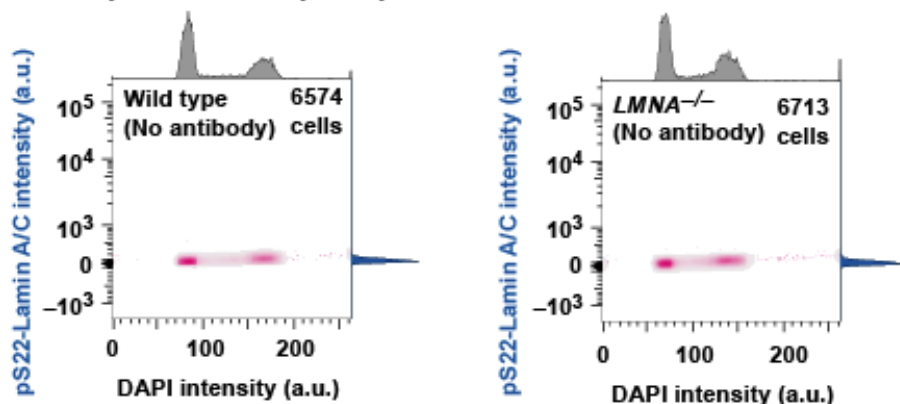

### D Entire Western blot shown in Fig. 1D

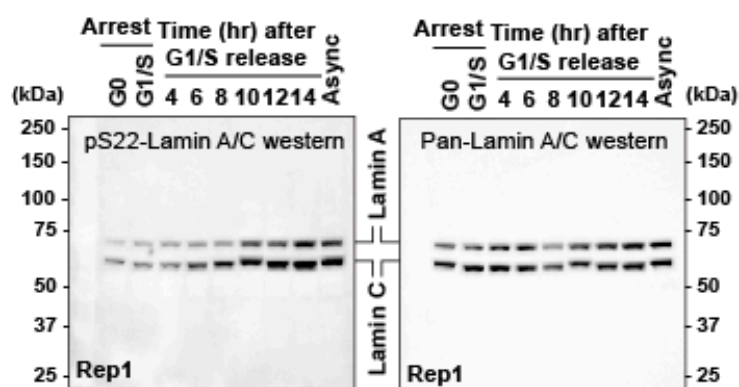

### E pS22-Lamin A/C western blot replicates

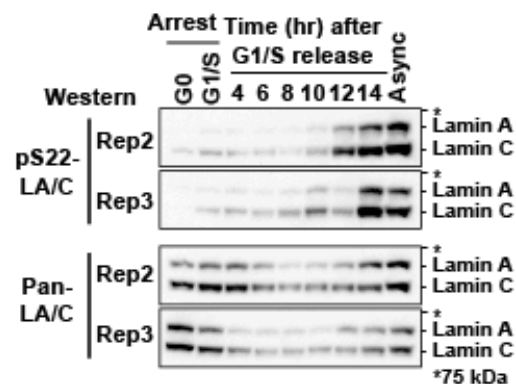

**Figure S1. Characterization of S22-phosphorylated Lamin A/C (related to Figure 1)**

**(A)** Anti-Lamin A/C antibodies used in this study.

**(B)** ELISA on immobilized synthetic phospho-S22 or non-phospho-S22-Lamin A/C peptides (aa2-29) incubated with anti-pS22-Lamin A/C or anti-pan-N-terminal-Lamin A/C antibodies. Circle, technical replicate. Line, Loess fit.

**(C)** Control flow cytometry analysis without anti-pS22-Lamin A/C antibody for **Fig. 1C**.

**(D)** Uncropped images of Western blots of synchronized wild-type BJ-5ta, part of which are shown in **Fig. 1D**. Left, blot detected with the anti-pS22-Lamin A/C antibody. Right, blot detected with the anti-pan-N-terminal-Lamin A/C antibody.

**(E)** (Top) Same as **D**, but two additional biological replicates are shown as cropped images.

**Figure S2**

**A** *pS22* and pan-Lamin A/C ChIP signals at LADs

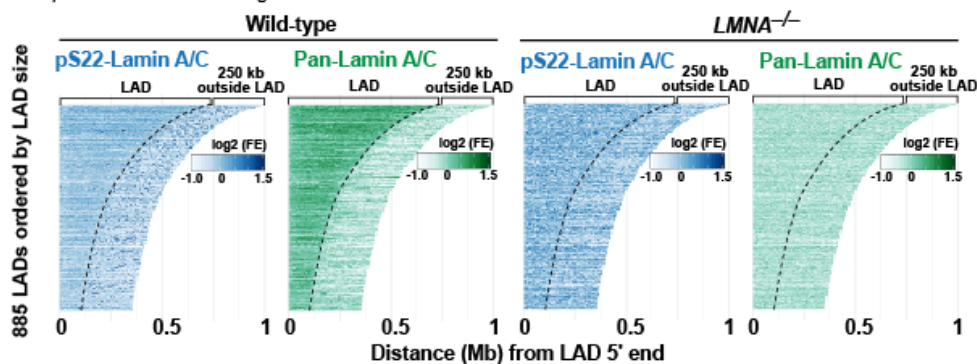

**B** Comparison of feature size

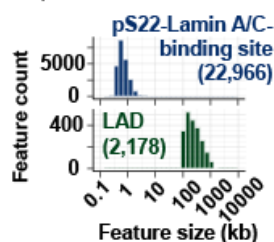

**C** Lamin A/C LAD vs. Lamin B1 LAD

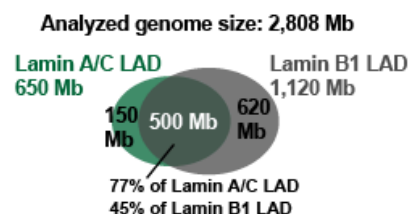

**D** *pS22*-Lamin A/C-binding sites vs. Lamin B1 LADs

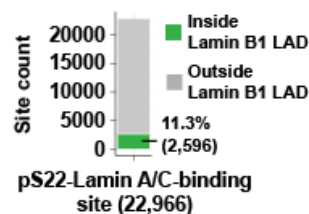

**E** Localization of phospho-mutant Lamin A/C in expressed in *LMNA*<sup>-/-</sup> cells

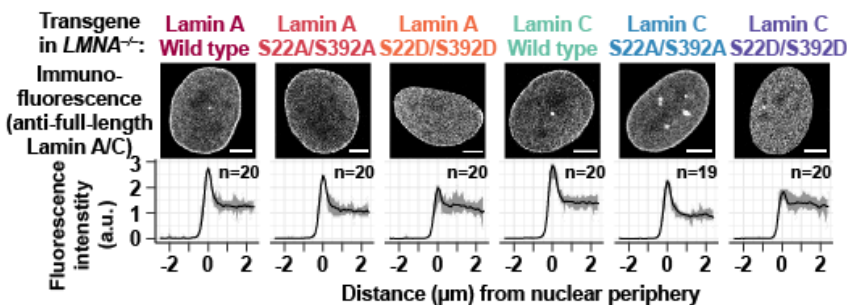

**F** Interior-to-peripheral fluorescence ratio

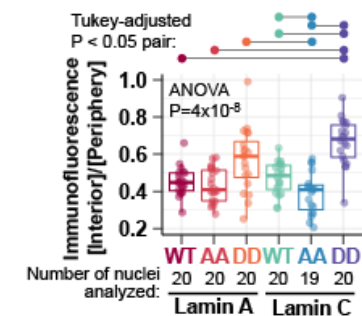

**G** ChIP-seq profiles of phospho-mutant Lamin A/C

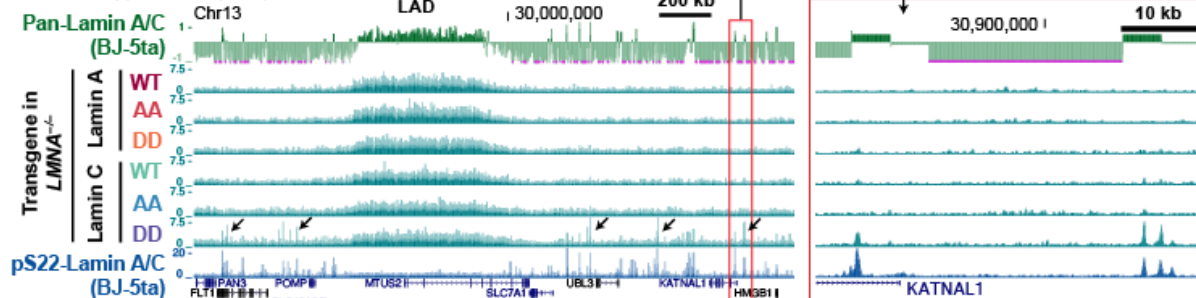

**H** Phospho-mutant ChIP signals at *pS22*-Lamin A/C-binding sites

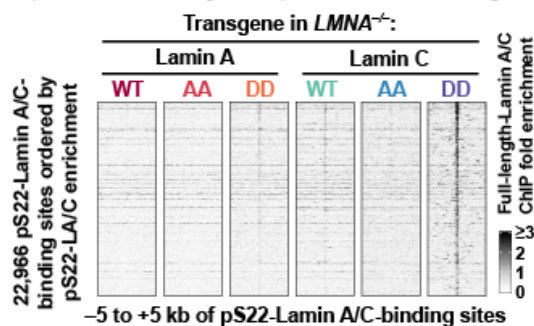

**I** Phospho-mutant ChIP signals at 2,178 Lamin A/C LADs

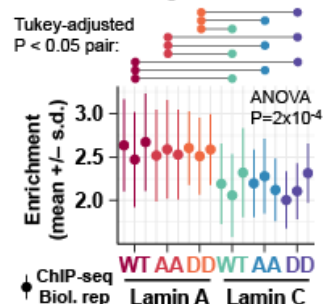

**Figure S2. Characterization of pS22-Lamin A/C-binding sites (related to Figure 2)**

**(A)** ChIP-seq fold-enrichment (FE) scores at Lamin A/C LADs defined by pan-N-terminal-Lamin A/C ChIP-seq. A subset of LADs that do not have adjacent LADs within 250 kb downstream of LADs are shown.

**(B)** Histogram of the size of pS22-Lamin A/C-binding sites and Lamin A/C LADs.

**(C)** Comparison of genomic domains covered by Lamin A/C LADs (in BJ-5ta, this study) or Lamin B1 LADs (lung fibroblast, Guelen et al., 2008).

**(D)** Location of pS22-Lamin A/C-binding sites with respect to the 1,302 Lamin B1 LADs.

**(E)** (Top) Immunofluorescence of transgene-driven Lamin A or Lamin C with phospho-deficient S22A/S392 mutations, or phospho-mimetic S22D/S392D mutations, or without mutation, expressed in *LMNA*<sup>-/-</sup> cells. The anti-full-length-Lamin A/C antibody (**Fig. S1A**) was used. (Bottom) Immunofluorescence signal distribution along a 5- $\mu$ m segment that crosses the nuclear periphery at 0  $\mu$ m (-2.5 to 2.5  $\mu$ m with negative coordinates indicating positions outside the nucleus). Line, mean. Shade, minimum to maximum. n, number of nuclei analyzed.

**(F)** Interior-to-periphery Lamin A/C immunofluorescence signal ratio in transgene-driven wild-type (WT), phospho-deficient (AA), and phospho-mimetic (DD) Lamin A/C expressed in *LMNA*<sup>-/-</sup> cells. Interior signals are the mean signal within +4 to +5  $\mu$ m of the aforementioned 5- $\mu$ m segment. Peripheral signals are the maximum signal within -0.5 to +0.5  $\mu$ m of the segment. One-way ANOVA compares the ratio of all isoforms, with post-hoc Tukey analysis for pairwise comparison (pairs with P<0.05 are indicated).

**(G)** Representative ChIP-seq profiles for transgene-driven wild-type (WT), phospho-deficient (AA), and phospho-mimetic (DD) Lamin A/C expressed in *LMNA*<sup>-/-</sup> cells. The anti-full-length-Lamin A/C antibody (**Fig. S1A**) was used in ChIP. Signals are FE scores. Pan-N-terminal Lamin A/C and pS22-Lamin A/C ChIP-seq profiles in BJ-5ta are shown for comparison. Arrows indicate positions at which phospho-mimetic Lamin C was enriched at pS22-Lamin A/C binding sites.

**(H)** ChIP-seq FE scores at the 22,966 pS22-Lamin A/C-binding sites.

**(I)** ChIP-seq FE scores across the 2,178 Lamin A/C LADs for each biological replicate. Mean of all FE scores within one LAD represents the FE score of that LAD. One-way ANOVA compares means of all isoforms, with post-hoc Tukey analysis for pairwise comparison (pairs with P<0.05 are indicated).

**Figure S3**

**A**

*pS22-Lamin A/C-binding sites vs. chromatin feature*

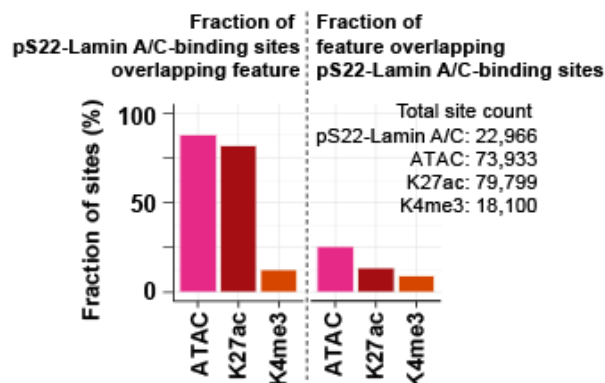

**B**

*pS22-Lamin A/C and chromatin signals at all ATAC sites*

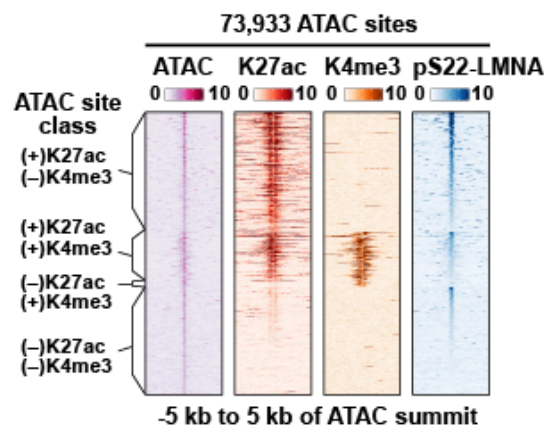

**C**

*c-Jun peak occurrence at pLAC-bound vs. -unbound ATAC sites with matching accessibility*

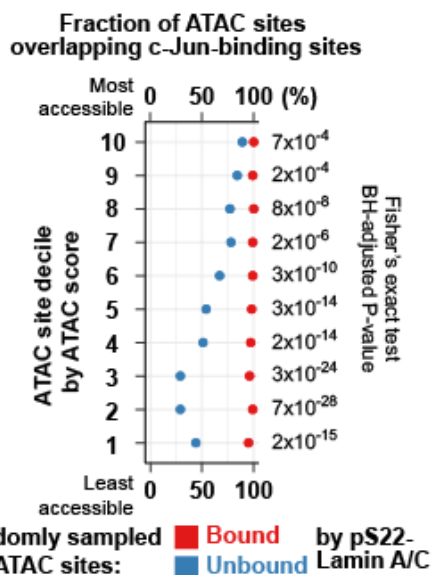

**D**

*c-Jun and H3K27ac levels at pLAC-bound vs. -unbound c-Jun-bound sites with matching chromatin accessibility*

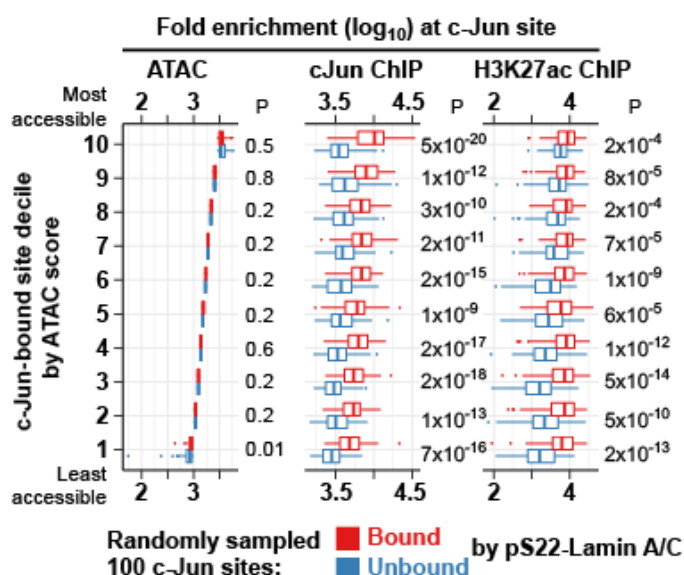

**E**

*pS22-Lamin A/C-binding sites vs. transcription of genes outside of LADs*

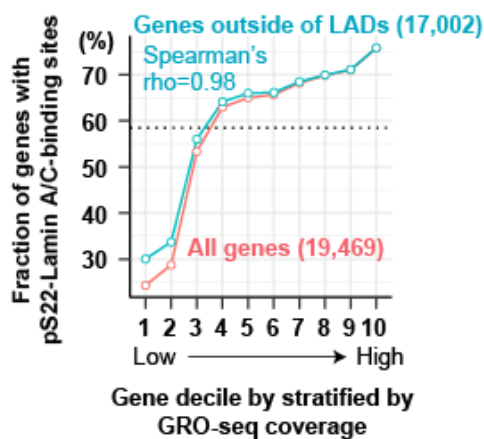

**F**

*pS22-Lamin A/C-binding sites vs. transcription of genes stratified by gene length or gene-gene distance*

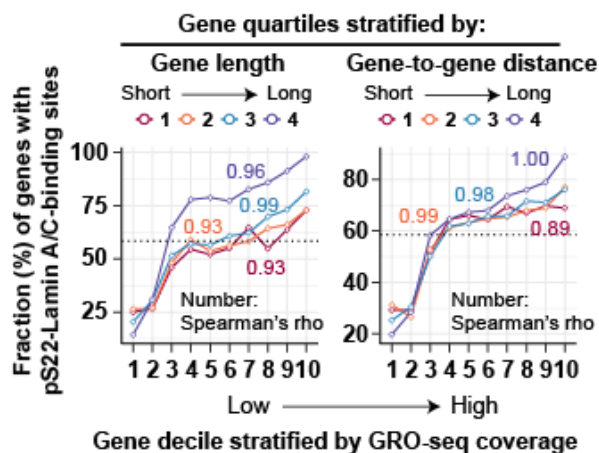

**Figure S3. Chromatin characteristics of pS22-Lamin A/C-binding sites (related to Figures 2 and 3)**

**(A)** Fraction of the 22,966 pS22-Lamin A/C-binding sites that overlap ATAC-seq-defined accessible sites, H3K27ac ChIP-seq peaks, or H3K4me3 ChIP-seq peaks in BJ-5ta.

**(B)** ATAC-seq and ChIP-seq fold-enrichment (FE) scores at the 73,933 ATAC-seq-defined accessible sites in BJ-5ta.

**(C)** Fraction of pS22-Lamin A/C-bound or -unbound ATAC sites overlapping c-Jun-binding sites. ATAC sites (total 73,933 sites) are stratified into deciles by ATAC FE scores, and from each decile, 100 pS22-Lamin A/C-bound and 100 pS22-Lamin A/C-unbound ATAC sites are randomly selected, and the intersection is assessed. Fisher's exact test compares association between being bound by pS22-Lamin A/C and being bound by c-Jun, and P-values are adjusted by the Benjamini-Hochberg method.

**(D)** c-Jun and H3K27ac ChIP-seq FE scores at c-Jun-binding sites bound or unbound by pS22-Lamin A/C. c-Jun-binding sites (total 87,988 sites) are stratified into deciles by ATAC FE scores, and from each decile, 100 pS22-Lamin A/C-bound and 100 pS22-Lamin A/C-unbound ATAC sites are randomly selected, and their FE score distribution is visualized. Sum of FE scores within +/-250 bp of ATAC site center is used for analysis. Mann-Whitney *U*-test compares FE scores between pS22-Lamin A/C-bound and -unbound sites, and P-values are adjusted for multiple comparisons by the Benjamini-Hochberg method.

**(E)** Fraction of genes with pS22-Lamin A/C-binding sites (within gene body or 100 kb upstream) in gene decile stratified by GRO-seq coverage in BJ-5ta. Genes are first stratified by GRO-seq coverage and then grouped by their TSS positions with respect to Lamin A/C LADs (either overlapped or not). Data for all genes (shown in **Fig. 3H**) is shown again here for comparison. Horizontal dotted line, fraction of all genes with pS22-Lamin A/C-binding sites.

**(F)** Same as **(E)**, but genes are stratified (after GRO-seq stratification) by gene length (left) or distance to closest genes (right).

**Figure S4**

**A**

RNA-seq data sets used in this study

| Data ID | Donor type | Cell line name | LMNA genotype | Donor age    | Donor sex | GEO accession | Data source      |
|---------|------------|----------------|---------------|--------------|-----------|---------------|------------------|
| KI429   | Normal     | GM08398        | N/A           | 8 yrs        | M         | GSM3104038    | This study       |
| KI430   | Normal     | GM07492        | N/A           | 17 yrs       | M         | GSM3104039    | This study       |
| KI433   | Normal     | GM08398        | N/A           | 8 yrs        | M         | GSM3104042    | This study       |
| KI434   | Normal     | GM07492        | N/A           | 17 yrs       | M         | GSM3104043    | This study       |
| s75     | Normal     | GM00969        | N/A           | 2 yrs        | F         | GSM3124626    | Fleischer et al. |
| s76     | Normal     | GM05565        | N/A           | 3 yrs        | M         | GSM3124627    | Fleischer et al. |
| s77     | Normal     | GM00498        | N/A           | 3 yrs        | M         | GSM3124628    | Fleischer et al. |
| s78     | Normal     | GM05381        | N/A           | 5 yrs        | M         | GSM3124629    | Fleischer et al. |
| s79     | Normal     | GM05400        | N/A           | 6 yrs        | M         | GSM3124630    | Fleischer et al. |
| s80     | Normal     | GM05757        | N/A           | 7 yrs        | M         | GSM3124631    | Fleischer et al. |
| s81     | Normal     | GM00409        | N/A           | 7 yrs        | M         | GSM3124632    | Fleischer et al. |
| s82     | Normal     | GM00499        | N/A           | 8 yrs        | M         | GSM3124633    | Fleischer et al. |
| s83     | Normal     | GM08398        | N/A           | 8 yrs        | M         | GSM3124634    | Fleischer et al. |
| s84     | Normal     | GM00038        | N/A           | 9 yrs        | F         | GSM3124635    | Fleischer et al. |
| KI431   | HGPS       | AG11498        | 1824C>T       | 14 yrs       | M         | GSM3104040    | This study       |
| KI432   | HGPS       | HGADFN167      | 1824C>T       | 8 yrs 5 mos  | M         | GSM3104041    | This study       |
| KI435   | HGPS       | AG11498        | 1824C>T       | 14 yrs       | M         | GSM3104044    | This study       |
| KI436   | HGPS       | HGADFN167      | 1824C>T       | 8 yrs 5 mos  | M         | GSM3104045    | This study       |
| s42     | HGPS       | AG11513        | 1824C>T       | 8 yrs        | F         | GSM3124693    | Fleischer et al. |
| s43     | HGPS       | HGADFN167      | 1824C>T       | 8 yrs 5 mos  | M         | GSM3124694    | Fleischer et al. |
| s44     | HGPS       | HGADFN188      | 1824C>T       | 2 yrs 3 mos  | F         | GSM3124695    | Fleischer et al. |
| s45     | HGPS       | HGADFN127      | 1824C>T       | 3 yrs 9 mos  | F         | GSM3124696    | Fleischer et al. |
| s46     | HGPS       | HGADFN164      | 1824C>T       | 4 yrs 8 mos  | F         | GSM3124697    | Fleischer et al. |
| s47     | HGPS       | HGADFN169      | 1824C>T       | 8 yrs 6 mos  | M         | GSM3124698    | Fleischer et al. |
| s48     | HGPS       | HGADFN178      | 1824C>T       | 6 yrs 11 mos | F         | GSM3124699    | Fleischer et al. |
| s49     | HGPS       | HGADFN122      | 1824C>T       | 5 yrs 0 mos  | F         | GSM3124700    | Fleischer et al. |
| s50     | HGPS       | HGADFN143      | 1824C>T       | 8 yrs 10 mos | M         | GSM3124701    | Fleischer et al. |
| s51     | HGPS       | HGADFN367      | 1824C>T       | 3 yrs 0 mos  | F         | GSM3124702    | Fleischer et al. |

Normal, normal individual;  
HGPS, patients with Hutchinson-Gilford Progeria Syndrome  
N/A, not available; M, male; F, female  
Fleischer et al, *Genome Biology* (2018) PMID: 30567591

**B**

Beta-galactosidase assay for senescence evaluation

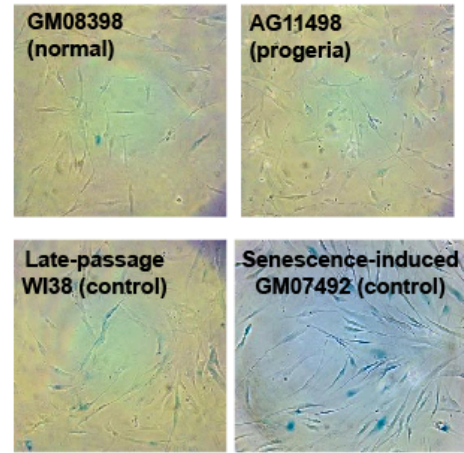

**C**

Quantification of beta-galactosidase assay

|          | Cell line | Condition                                           | Positive cell % | Total cell count |
|----------|-----------|-----------------------------------------------------|-----------------|------------------|
| Control  | WI38      | Early passage (PD25)                                | 0%              | 206              |
|          | WI38      | Late passage (PD41)                                 | 75%             | 156              |
|          | WI38      | 400 $\mu$ M H <sub>2</sub> O <sub>2</sub> (induced) | 83%             | 151              |
|          | GM07      | 300 $\mu$ M H <sub>2</sub> O <sub>2</sub> (induced) | 47%             | 201              |
| Normal   | GM07      | Upon harvest                                        | 0.5%            | 195              |
|          | GM08      | Upon harvest                                        | 2%              | 206              |
| Progeria | AG11      | Upon harvest                                        | 3%              | 206              |
|          | HG16      | Upon harvest                                        | 1.5%            | 201              |

**D**

Principal component analysis of normal and progeria RNA-seq data sets with data ID annotation

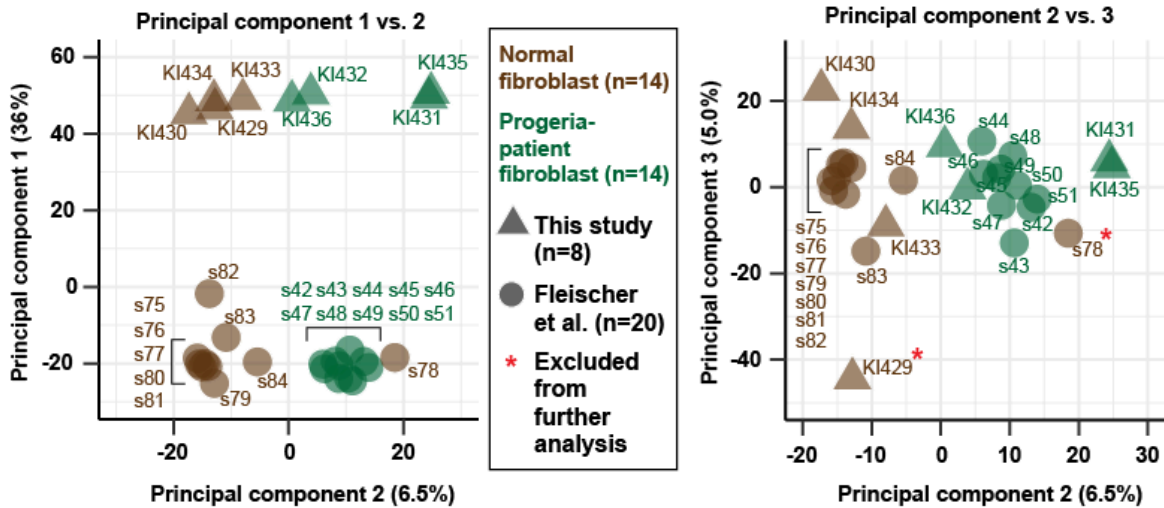

**Figure S4. RNA-seq in progeria-patient and normal fibroblasts (related to Figure 4)**

**(A)** The 28 RNA-seq datasets used in this study.

**(B)** Representative images of beta-galactosidase assay evaluating the extent of cell senescence. The assay was performed in the first biological replicate of cells used in RNA-seq and ChIP-seq.

**(C)** Quantification of beta-galactosidase assay. Early-passage WI38 fibroblasts serve as a negative control. Late-passage WI38 serves as a positive control. WI38 and GM07492 cells treated with H<sub>2</sub>O<sub>2</sub> serve as additional positive controls. Cell line notation: GM08, GM08398. GM07, GM07492. AG11, AG11498. HG16, HGADFN167.

**(D)** Principal component analyses (PCA) of the 28 RNA-seq datasets with sample labels. PCA was performed on RNA-seq RPKMs for all 31,561 genes (see *Gene annotation* in **Methods**). The left panel without sample labels is shown in **Fig. 4A**.



**Figure S5**

**A**

Representative gained LADs

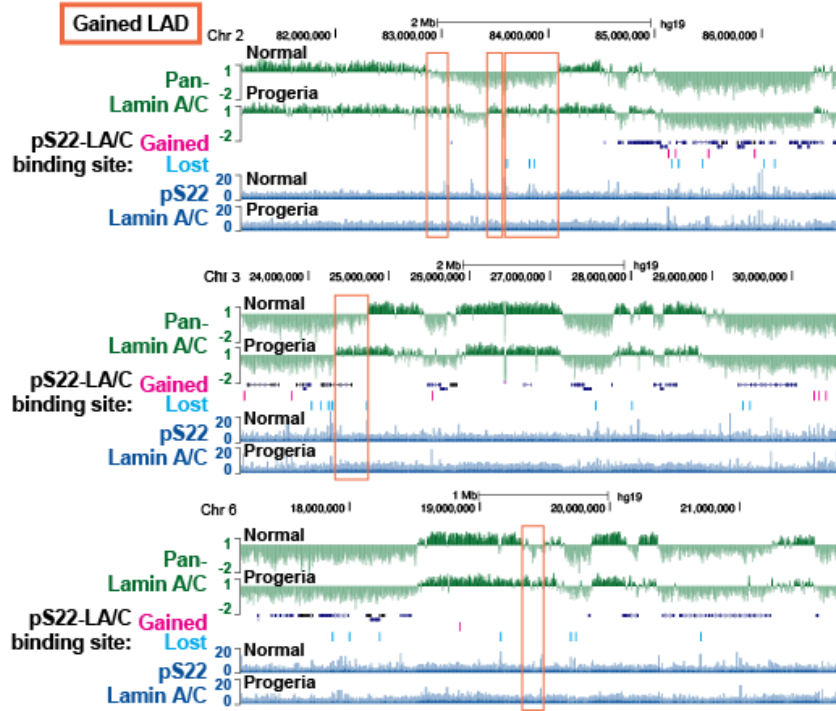

**B**

Representative lost LADs

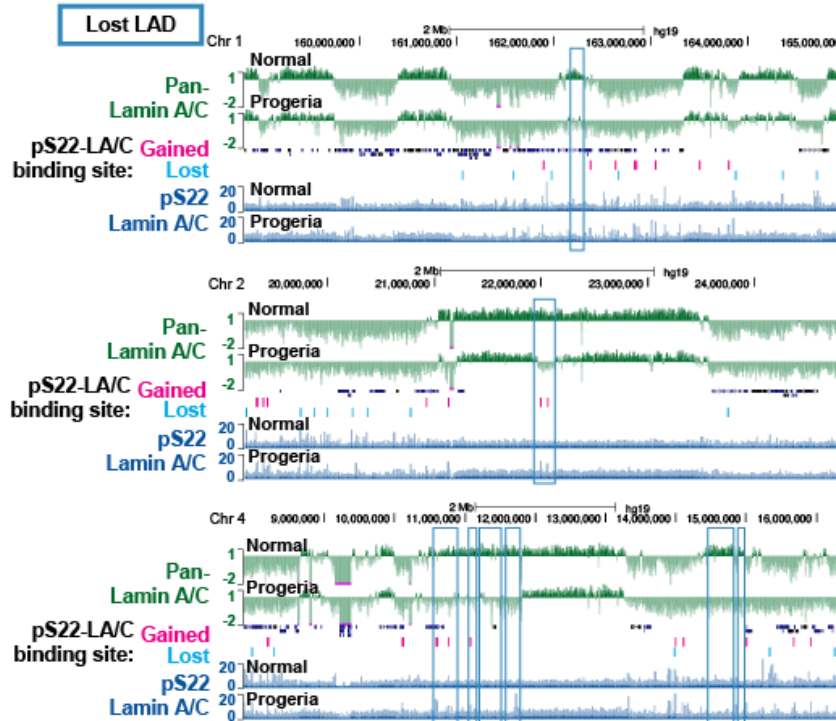

**C**

Disease terms for progeria-down genes linked to gained LADs

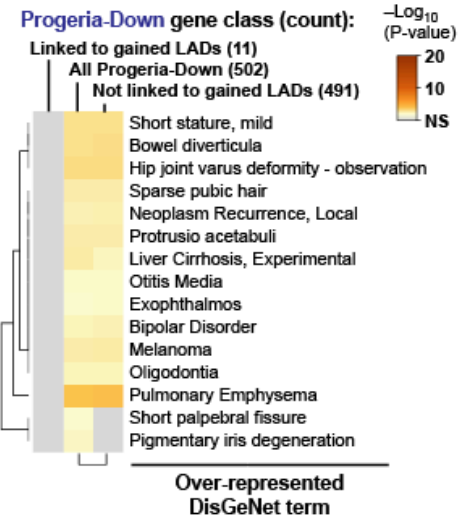

**D**

Disease terms for progeria-up genes linked to lost LADs

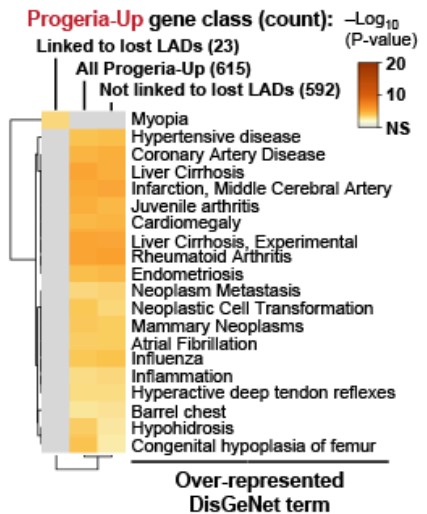

**Figure S5. Gained and lost LADs in progeria-patient fibroblasts (related to Figure 5)**

**(A)** Representative pan-N-terminal-Lamin A/C (pan-Lamin A/C) and pS22-Lamin A/C ChIP-seq profiles in normal (GM07492) and progeria-patient (AG11498) fibroblasts. Signals are fold-enrichment (FE) scores. Box, gained LADs in progeria-patient fibroblasts. Pan-N-terminal-Lamin A/C profiles are in the  $\log_2$  scale to visualize LAD patterns.

**(B)** Same as **(A)**, but boxes indicate lost LADs in progeria-patient fibroblasts.

**(C)** DisGeNet-curated disease terms over-represented among progeria-down genes linked to gained LADs, progeria-down genes not linked to gained LADs, and all progeria-down genes. No terms are enriched among progeria-down genes linked to gained LADs.

**(D)** Same as **(C)**, but progeria-up genes linked to lost LADs, progeria-up genes not linked to lost LADs, and all progeria-up genes are shown.

**Figure S6**

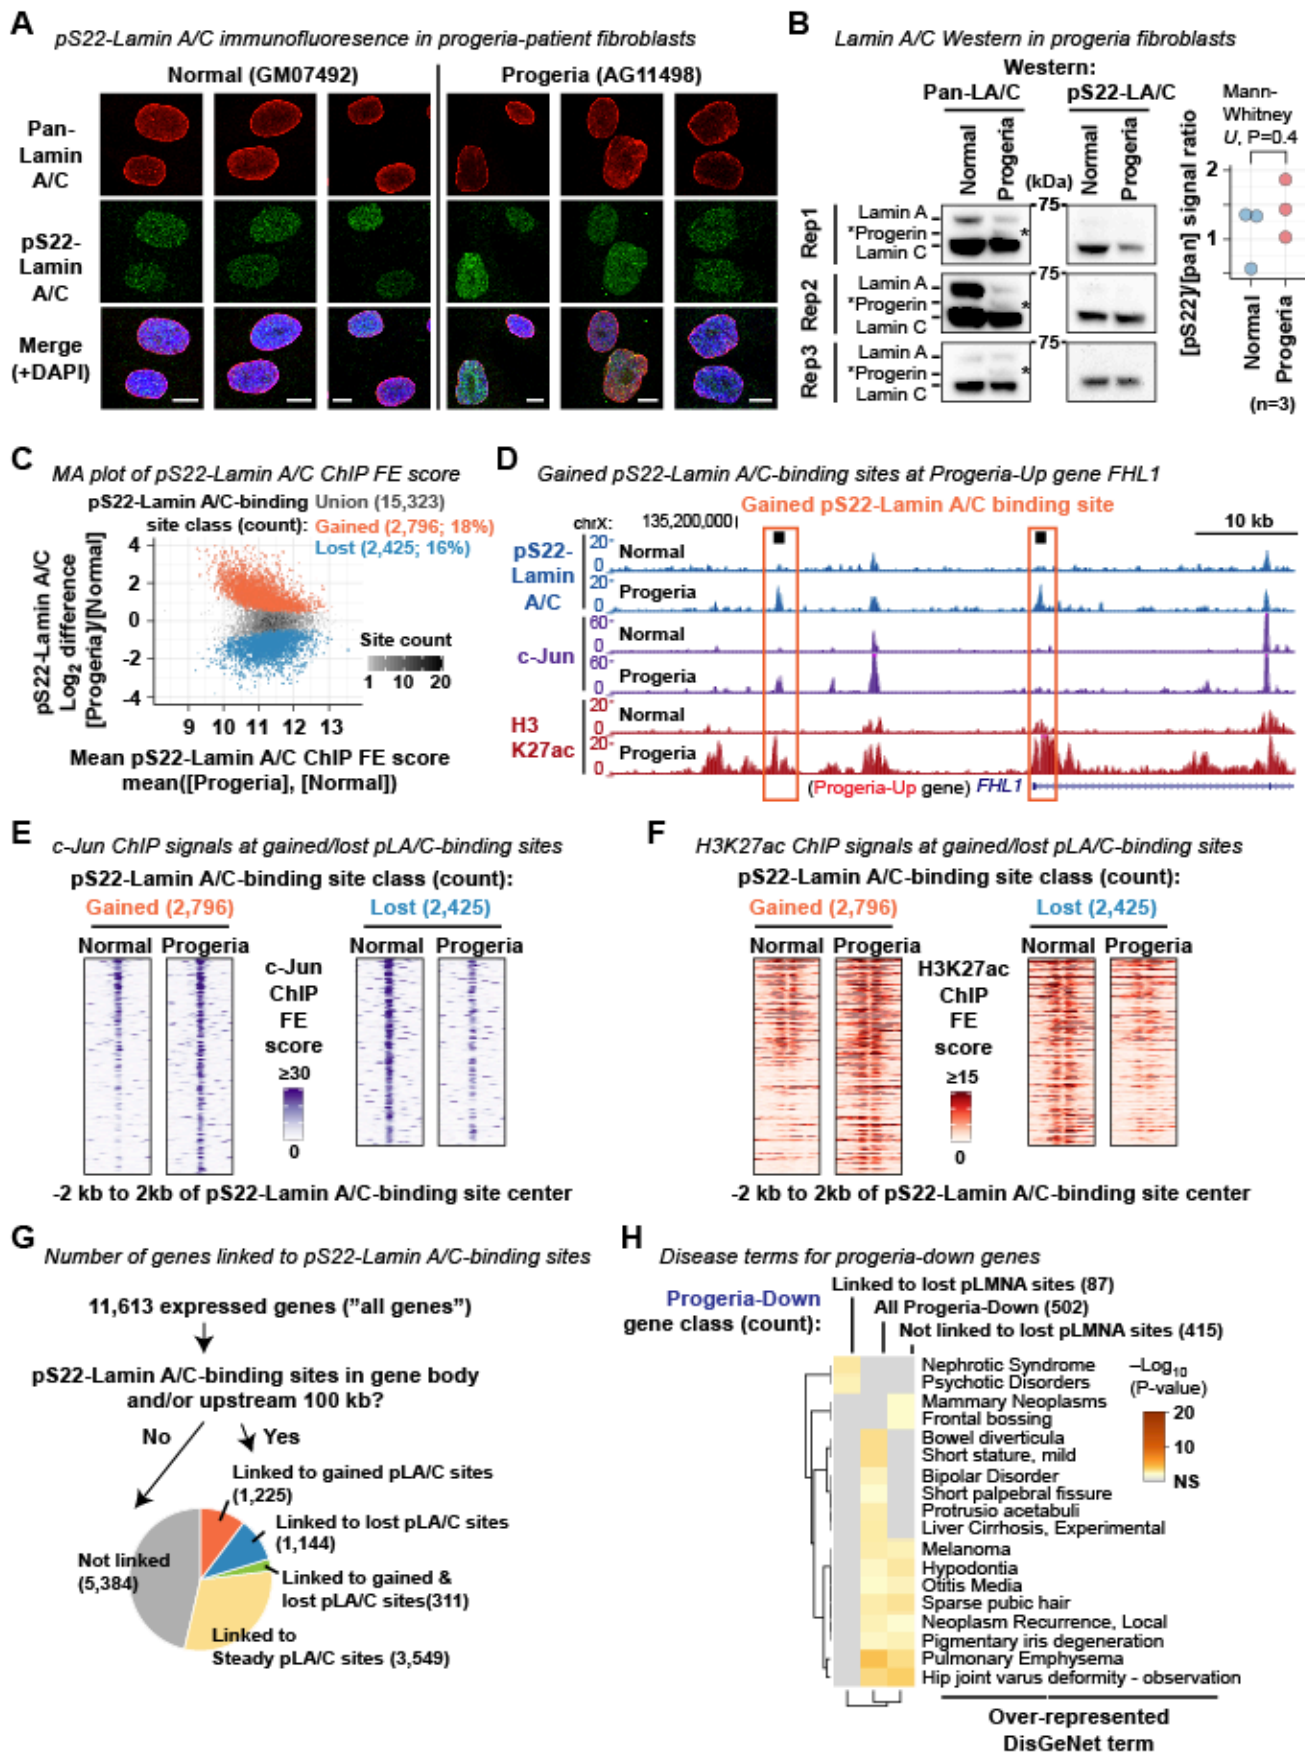

**Figure S6. Gained and lost pS22-Lamin A/C-binding sites in progeria-patient fibroblasts (related to Figure 6)**

**(A)** Immunofluorescence using the anti-pan-N-terminal Lamin A/C antibody and anti-pS22-Lamin A/C antibody in normal and progeria fibroblasts. Representative images from 3 biological replicates are shown.

**(B)** (Left) Western blot for pan-N-terminal-Lamin A/C and pS22-Lamin A/C on normal (GM07492) and progeria fibroblast (AG11498) extracts. Asterisks indicate the Western blot signals for progerin.

**(C)** MA plot for the 15,323 union pS22-Lamin A/C-binding sites, highlighting gained and lost pS22-Lamin A/C-binding sites. Sum of pS22-Lamin A/C ChIP FE scores within  $\pm 250$  bp of the site center is compared. Normal, normal fibroblast GM07492. Progeria, progeria fibroblast AG11498.

**(D)** pS22-Lamin A/C, c-Jun, and H3K27ac ChIP-seq profiles at the *FHL-1* locus highlighting gained pS22-Lamin A/C-binding sites. Signals are FE scores. The *FHL-1* gene is among the genes up-regulated in progeria fibroblasts, and its mutations cause cardiac and skeletal myopathies. Normal, GM07492 normal fibroblast. Progeria, AG11498 progeria fibroblast.

**(E)** c-Jun ChIP-seq FE score distribution around gained pS22-Lamin A/C-binding sites and lost pS22-Lamin A/C-binding sites.

**(F)** Same as **(E)** but H3K27ac ChIP-seq FE scores are shown.

**(G)** Number and fraction of genes linked to gained, lost, and steady pS22-Lamin A/C-binding sites.

**(H)** DisGeNet-curated disease terms over-represented among progeria-down genes linked to lost pS22-Lamin A/C-binding sites, or those not linked to lost pS22-Lamin A/C-binding sites, or all progeria-down genes.
